# Supplementary material
Source: publisher figshare collection journal article supplement (https://gsapubs.figshare.com/ndownloader/files/22741754)
Supplement: Supplementary file 1 [file 22741754]

GSA Data Repository Item # 91-36

Title of article A eustatic sea-level curve based on a stable frame of  
reference: Preliminary results

Author(s) Dork L. Sahagian and Steven M. Holland

see Geology v. 19, p. 1209 - 1212

### Contents

Appendix 1 & 2 - 2 pg.  
\_\_\_\_\_  
\_\_\_\_\_  
\_\_\_\_\_  
\_\_\_\_\_  
\_\_\_\_\_  
\_\_\_\_\_  
\_\_\_\_\_  
\_\_\_\_\_  
\_\_\_\_\_

# APPENDIX 1- RUSSIAN PLATFORM STRATIGRAPHIC DATA

Lomov well:

| Horizon         | Thickness (m) | Lithology | Depth (m) |
|-----------------|---------------|-----------|-----------|
| Late Albian     | 18.0          | shale     | 10        |
| Mid Albian      | 22.0          | sandstone | 10        |
| Late Aptian     | 35.5          | shale     | 10        |
| Early Aptian    | 42.0          | shale     | 10        |
| Late Barremian  | 40.0          | shale     | 10        |
| Early Barremian | 22.0          | shale     | 10        |
| Valanginian     | 2.5           | sandstone | 2         |
| Oxfordian       | 1.5           | shale     | 10        |
| Early Callovian | 13.0          | shale     | 10        |
| Early Bathonian | 7.0           | shale     | 10        |
| Late Bajocian   | 3.0           | sandstone | 2         |

Klimovka well:

| Horizon                 | Thickness (m) | Lithology | Depth (m) |
|-------------------------|---------------|-----------|-----------|
| Late Albian             | 40.0          | shale     | 10        |
| Mid Albian              | 15.5          | shale     | 10        |
| Late Aptian             | 35.5          | shale     | 10        |
| Early Aptian            | 44.0          | shale     | 10        |
| Late Barremian          | 34.0          | shale     | 10        |
| Hauterivian / Barremian | 86.0          | shale     | 10        |
| Valanginian             | 5.0           | shale     | 10        |

Inza well:

| Horizon                            | Thickness (m) | Lithology | Depth (m) |
|------------------------------------|---------------|-----------|-----------|
| Late Albian                        | 21.5          | shale     | 25        |
| Mid Albian                         | 34.5          | shale     | 10        |
| Late Aptian                        | 20.0          | shale     | 25        |
| Early Aptian                       | 52.5          | shale     | 10        |
| Late Barremian                     | 38.0          | shale     | 10        |
| Late Hauterivian / Early Barremian | 37.1          | shale     | 25        |
| Valanginian                        | 1.0           | sandstone | 2         |

## Appendix 2.-- Depositional environments

| Environment     | Description                                                                                                                 | Depth<br>(m) |
|-----------------|-----------------------------------------------------------------------------------------------------------------------------|--------------|
| Terrestrial     | Fluvial deposits, soils                                                                                                     | -2           |
| Shoreface       | wave-agitated shallowest<br>marine; crossbedded<br>sandstones                                                               | 2            |
| Lagoonal        | Protected, quiet water<br>shallow marine; fine-grained<br>deposits with brackish<br>influence                               | 2            |
| Transition Zone | Mid-shelf deposits of<br>variable water energy;<br>heterolithic, lithologically<br>variable, common storm<br>deposits       | 10           |
| Offshore        | Outer shelf setting of<br>generally low water energy;<br>rare storm deposits,<br>dominantly fine-grained<br>(rare in study) | 25           |
| Deeper Marine   | Pelagic and slope deposits<br>(not encountered in study)                                                                    | >25          |
